# Supplementary material for: Involvement of Salicylic Acid in Anthracnose Infection in Tea Plants Revealed by Transcriptome Profiling
Source: PubMed Central journal article supplement (PMC6566613; doi:10.3390/ijms20102439), 2019-05-17
Supplement: ijms-20-02439-s001.pdf [file ijms-20-02439-s001.pdf]

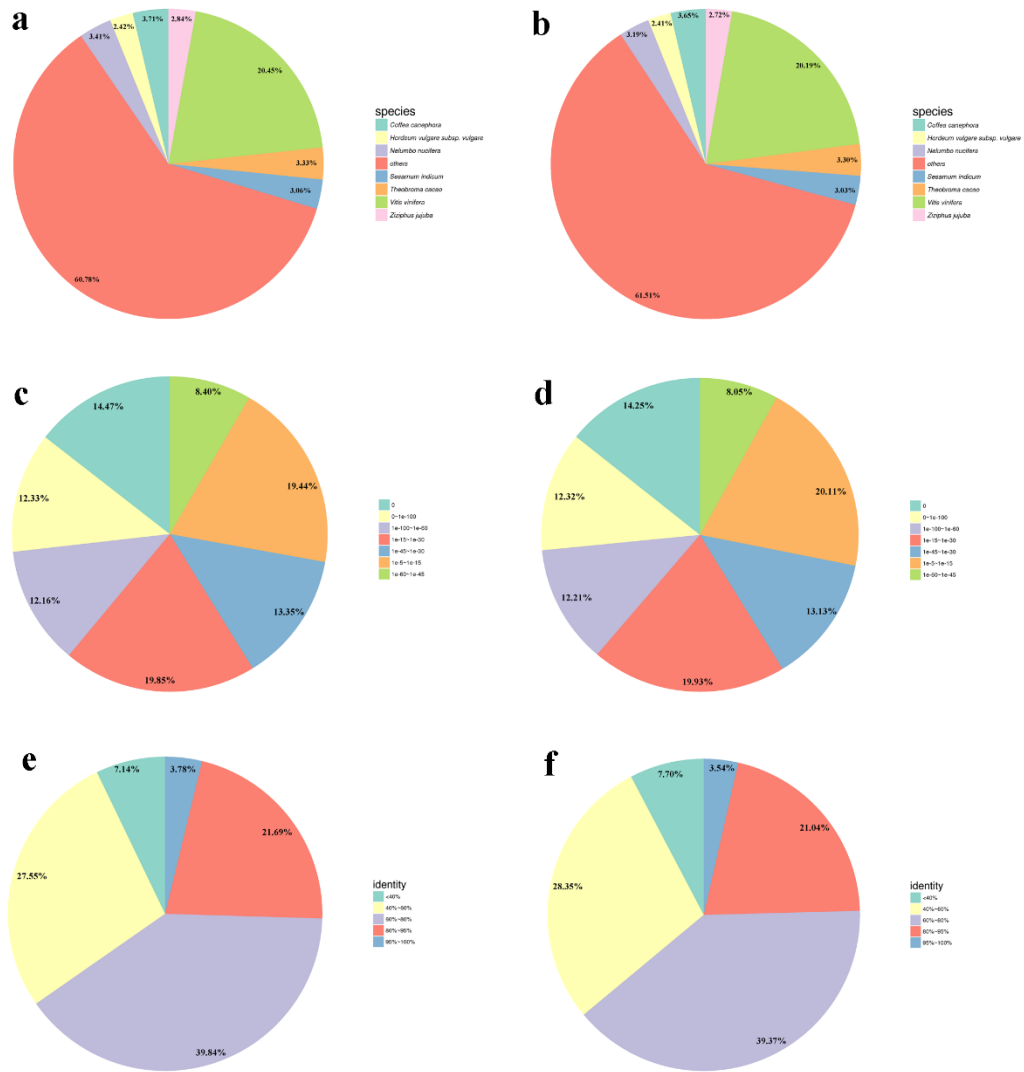

**Figure S1.** Characteristics of homology searching in *Camellia sinensis* against the NR database. (a, b) Species distribution of the top hits using BLASTX. (c, d) E-value distribution of NR annotation. (e, f) The similarity distribution of annotation in NR database. a, c, e being from cultivar LJ43, and b, d, f being from cultivar ZN139.

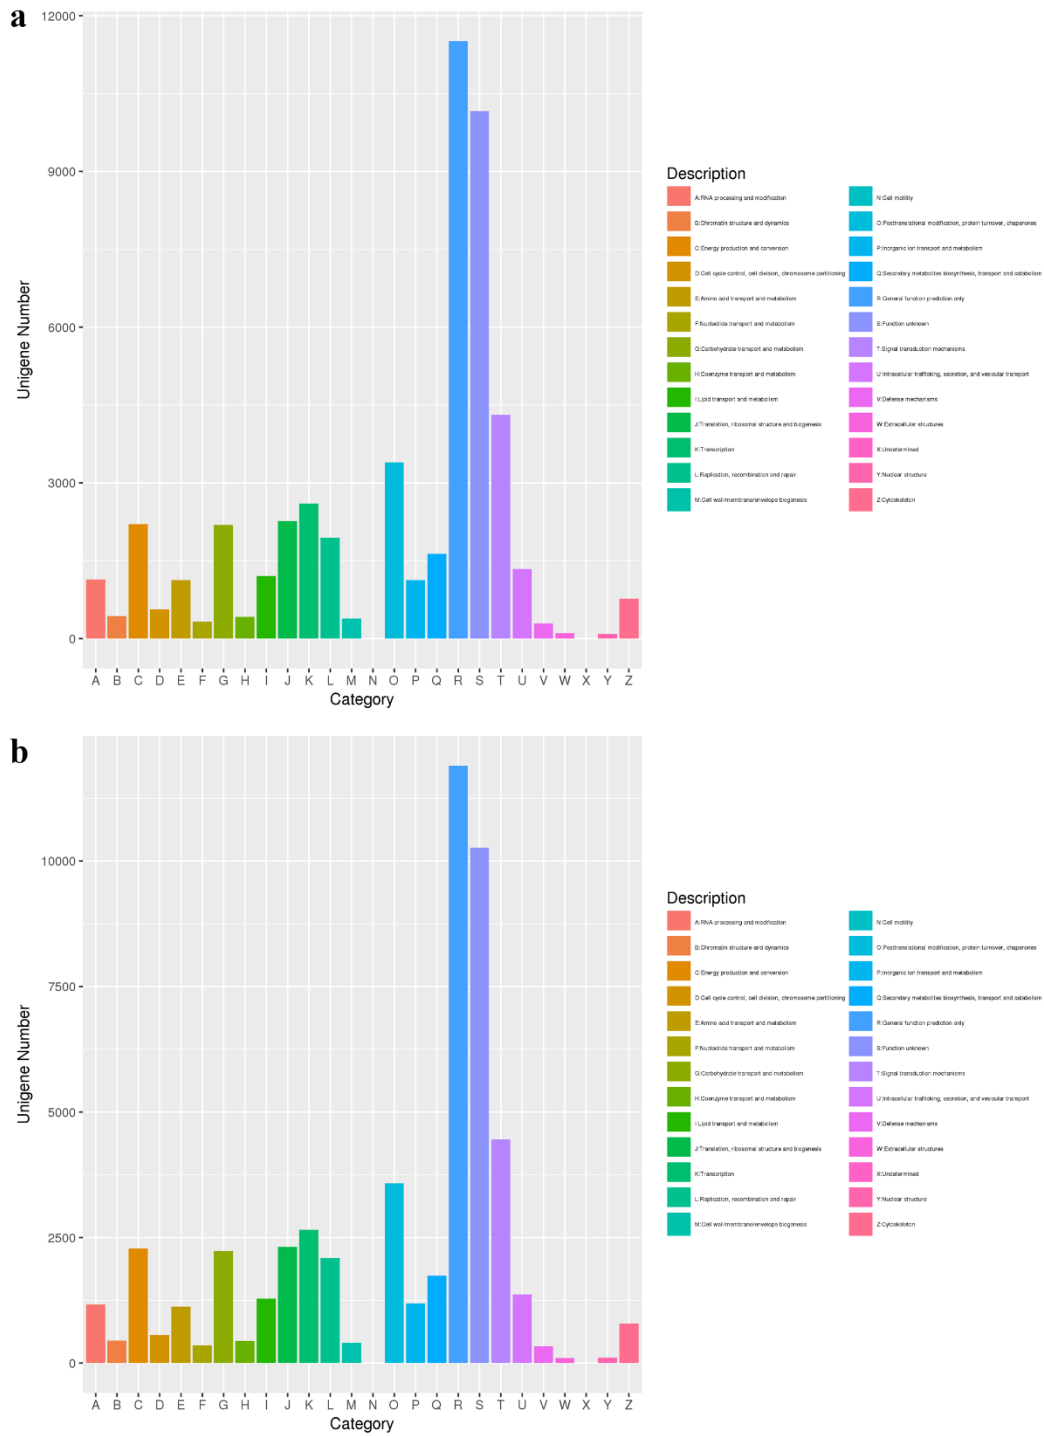

**Figure S2.** eggNOG functional classification of consensus sequence. (a) LJ43. (b) ZN139.



|                    |            |                                                       |       |
|--------------------|------------|-------------------------------------------------------|-------|
| biological_process | GO:0032502 | developmental process                                 | 702   |
| biological_process | GO:0040007 | growth                                                | 96    |
| biological_process | GO:0040011 | locomotion                                            | 5     |
| biological_process | GO:0044699 | single-organism process                               | 8182  |
| biological_process | GO:0044848 | biological phase                                      | 0     |
| biological_process | GO:0048511 | rhythmic process                                      | 8     |
| biological_process | GO:0050896 | response to stimulus                                  | 2112  |
| biological_process | GO:0051179 | localization                                          | 2634  |
| biological_process | GO:0051704 | multi-organism process                                | 264   |
| biological_process | GO:0065007 | biological regulation                                 | 2812  |
| biological_process | GO:0071840 | cellular component organization or biogenesis         | 1753  |
| biological_process | GO:0098743 | cell aggregation                                      | 0     |
| biological_process | GO:0098754 | detoxification                                        | 163   |
| biological_process | GO:0099531 | presynaptic process involved in synaptic transmission | 0     |
| cellular_component | GO:0005576 | extracellular region                                  | 302   |
| cellular_component | GO:0005623 | cell                                                  | 9376  |
| cellular_component | GO:0009295 | nucleoid                                              | 18    |
| cellular_component | GO:0016020 | membrane                                              | 8177  |
| cellular_component | GO:0019012 | virion                                                | 31    |
| cellular_component | GO:0030054 | cell junction                                         | 256   |
| cellular_component | GO:0031012 | extracellular matrix                                  | 3     |
| cellular_component | GO:0031974 | membrane-enclosed lumen                               | 516   |
| cellular_component | GO:0032991 | macromolecular complex                                | 3002  |
| cellular_component | GO:0039679 | viral occlusion body                                  | 0     |
| cellular_component | GO:0043226 | organelle                                             | 6518  |
| cellular_component | GO:0044215 | other organism                                        | 0     |
| cellular_component | GO:0044217 | other organism part                                   | 0     |
| cellular_component | GO:0044420 | extracellular matrix component                        | 0     |
| cellular_component | GO:0044421 | extracellular region part                             | 20    |
| cellular_component | GO:0044422 | organelle part                                        | 2995  |
| cellular_component | GO:0044423 | virion part                                           | 31    |
| cellular_component | GO:0044425 | membrane part                                         | 6130  |
| cellular_component | GO:0044456 | synapse part                                          | 0     |
| cellular_component | GO:0044464 | cell part                                             | 9287  |
| cellular_component | GO:0045202 | synapse                                               | 0     |
| cellular_component | GO:0055044 | symplast                                              | 256   |
| cellular_component | GO:0097423 | mitochondrion-associated adherens complex             | 0     |
| cellular_component | GO:0099512 | supramolecular fiber                                  | 174   |
| molecular_function | GO:0000988 | transcription factor activity, protein binding        | 74    |
| molecular_function | GO:0001071 | nucleic acid binding transcription factor activity    | 368   |
| molecular_function | GO:0003824 | catalytic activity                                    | 12293 |
| molecular_function | GO:0004871 | signal transducer activity                            | 201   |
| molecular_function | GO:0005198 | structural molecule activity                          | 1224  |

|                       |            |                                                       |               |
|-----------------------|------------|-------------------------------------------------------|---------------|
| molecular_function    | GO:0005215 | transporter activity                                  | 1512          |
| molecular_function    | GO:0005488 | binding                                               | 11962         |
| molecular_function    | GO:0009055 | electron carrier activity                             | 180           |
| molecular_function    | GO:0016015 | morphogen activity                                    | 0             |
| molecular_function    | GO:0016209 | antioxidant activity                                  | 190           |
| molecular_function    | GO:0016530 | metallochaperone activity                             | 4             |
| molecular_function    | GO:0031386 | protein tag                                           | 5             |
| molecular_function    | GO:0036370 | D-alanyl carrier activity                             | 0             |
| molecular_function    | GO:0042056 | chemoattractant activity                              | 0             |
| molecular_function    | GO:0045182 | translation regulator activity                        | 0             |
| molecular_function    | GO:0045499 | chemorepellent activity                               | 0             |
| molecular_function    | GO:0045735 | nutrient reservoir activity                           | 15            |
| molecular_function    | GO:0060089 | molecular transducer activity                         | 120           |
| molecular_function    | GO:0098772 | molecular function regulator                          | 248           |
| <b>ZN139 Category</b> | <b>GO</b>  | <b>Description</b>                                    | <b>Number</b> |
| biological_process    | GO:0000003 | reproduction                                          | 401           |
| biological_process    | GO:0001906 | cell killing                                          | 2             |
| biological_process    | GO:0002376 | immune system process                                 | 53            |
| biological_process    | GO:0007610 | behavior                                              | 0             |
| biological_process    | GO:0008152 | metabolic process                                     | 12554         |
| biological_process    | GO:0009987 | cellular process                                      | 12554         |
| biological_process    | GO:0022414 | reproductive process                                  | 400           |
| biological_process    | GO:0022610 | biological adhesion                                   | 2             |
| biological_process    | GO:0023052 | signaling                                             | 723           |
| biological_process    | GO:0032501 | multicellular organismal process                      | 651           |
| biological_process    | GO:0032502 | developmental process                                 | 654           |
| biological_process    | GO:0040007 | growth                                                | 109           |
| biological_process    | GO:0040011 | locomotion                                            | 4             |
| biological_process    | GO:0044699 | single-organism process                               | 8110          |
| biological_process    | GO:0044848 | biological phase                                      | 0             |
| biological_process    | GO:0048511 | rhythmic process                                      | 6             |
| biological_process    | GO:0050896 | response to stimulus                                  | 2105          |
| biological_process    | GO:0051179 | localization                                          | 2638          |
| biological_process    | GO:0051704 | multi-organism process                                | 258           |
| biological_process    | GO:0065007 | biological regulation                                 | 2770          |
| biological_process    | GO:0071840 | cellular component organization or biogenesis         | 1748          |
| biological_process    | GO:0098743 | cell aggregation                                      | 0             |
| biological_process    | GO:0098754 | detoxification                                        | 157           |
| biological_process    | GO:0099531 | presynaptic process involved in synaptic transmission | 0             |
| cellular_component    | GO:0005576 | extracellular region                                  | 294           |
| cellular_component    | GO:0005623 | cell                                                  | 9543          |
| cellular_component    | GO:0009295 | nucleoid                                              | 20            |
| cellular_component    | GO:0016020 | membrane                                              | 8193          |

|                    |            |                                                    |       |
|--------------------|------------|----------------------------------------------------|-------|
| cellular_component | GO:0019012 | virion                                             | 36    |
| cellular_component | GO:0030054 | cell junction                                      | 260   |
| cellular_component | GO:0031012 | extracellular matrix                               | 5     |
| cellular_component | GO:0031974 | membrane-enclosed lumen                            | 494   |
| cellular_component | GO:0032991 | macromolecular complex                             | 3066  |
| cellular_component | GO:0039679 | viral occlusion body                               | 0     |
| cellular_component | GO:0043226 | organelle                                          | 6648  |
| cellular_component | GO:0044215 | other organism                                     | 0     |
| cellular_component | GO:0044217 | other organism part                                | 0     |
| cellular_component | GO:0044420 | extracellular matrix component                     | 0     |
| cellular_component | GO:0044421 | extracellular region part                          | 22    |
| cellular_component | GO:0044422 | organelle part                                     | 3046  |
| cellular_component | GO:0044423 | virion part                                        | 36    |
| cellular_component | GO:0044425 | membrane part                                      | 6087  |
| cellular_component | GO:0044456 | synapse part                                       | 0     |
| cellular_component | GO:0044464 | cell part                                          | 9464  |
| cellular_component | GO:0045202 | synapse                                            | 0     |
| cellular_component | GO:0055044 | symplast                                           | 260   |
| cellular_component | GO:0097423 | mitochondrion-associated adherens complex          | 0     |
| cellular_component | GO:0099512 | supramolecular fiber                               | 150   |
| molecular_function | GO:0000988 | transcription factor activity, protein binding     | 73    |
| molecular_function | GO:0001071 | nucleic acid binding transcription factor activity | 374   |
| molecular_function | GO:0003824 | catalytic activity                                 | 12431 |
| molecular_function | GO:0004871 | signal transducer activity                         | 194   |
| molecular_function | GO:0005198 | structural molecule activity                       | 1281  |
| molecular_function | GO:0005215 | transporter activity                               | 1503  |
| molecular_function | GO:0005488 | binding                                            | 12049 |
| molecular_function | GO:0009055 | electron carrier activity                          | 173   |
| molecular_function | GO:0016015 | morphogen activity                                 | 0     |
| molecular_function | GO:0016209 | antioxidant activity                               | 188   |
| molecular_function | GO:0016530 | metallochaperone activity                          | 4     |
| molecular_function | GO:0031386 | protein tag                                        | 7     |
| molecular_function | GO:0036370 | D-alanyl carrier activity                          | 0     |
| molecular_function | GO:0042056 | chemoattractant activity                           | 0     |
| molecular_function | GO:0045182 | translation regulator activity                     | 0     |
| molecular_function | GO:0045499 | chemorepellent activity                            | 0     |
| molecular_function | GO:0045735 | nutrient reservoir activity                        | 19    |
| molecular_function | GO:0060089 | molecular transducer activity                      | 111   |
| molecular_function | GO:0098772 | molecular function regulator                       | 258   |

**Table S2.** qRT-PCR primers of selected unigenes.

| <b>Gene ID</b> |                | <b>Primer Sequence</b>   |
|----------------|----------------|--------------------------|
| actin          | Forward Primer | CTTCCTCATGCTATCCTCCGTCTT |
|                | Reverse Primer | ATTTCCCGTTCAGCAGTGGTG    |
| ALD1           | Forward Primer | GCAAGGCAACATGGAATTAAGG   |
|                | Reverse Primer | GAGCATCTGAAGGCGAGATATG   |
| NPR1-F         | Forward Primer | CGGTGAATTCAGTGGGATATGA   |
|                | Reverse Primer | TGCTCTCTCGCCACAATTAG     |
| TGA3-F         | Forward Primer | GAAAGCAGATGCTGCAAAGG     |
|                | Reverse Primer | GGAATCCTCCAAGCCAAAGA     |
| TGA2-F         | Forward Primer | CCTGCATGGCCTATGAGATT     |
|                | Reverse Primer | CAGATGTGCCTCAACCTTACT    |
| PR1-F          | Forward Primer | TGTCGGATGCAGTGAAGATG     |
|                | Reverse Primer | ACCCTATTTGTGCGGTGTT      |
